# Supplementary material
Source: PubMed Central journal article supplement (PMC5119773)
Supplement: NIHMS819499-supplement-7.pdf [file NIHMS819499-supplement-7.pdf]

**Table S1. Summary of tRNA m<sup>1</sup>A58 methylation in human tRNAs, related to Figure 2 and Figure S2.**

| tRNA               | m <sup>1</sup> A site | ALKBH1 target   |
|--------------------|-----------------------|-----------------|
| Ala <sup>AGC</sup> | Yes                   | Not validated   |
| Ala <sup>CGC</sup> | Yes                   | Yes (this work) |
| Ala <sup>UGC</sup> | Yes                   | Yes (this work) |
| Arg <sup>ACG</sup> | Yes                   | Not validated   |
| Arg <sup>CCG</sup> | Yes                   | Not validated   |
| Arg <sup>CCU</sup> | Yes                   | Not validated   |
| Arg <sup>UCG</sup> | Yes                   | Not validated   |
| Arg <sup>UCU</sup> | Yes                   | Not validated   |
| Asn <sup>GUU</sup> | Yes                   | Yes (this work) |
| Asp <sup>GUC</sup> | No                    | Not validated   |
| Cys <sup>GCA</sup> | Yes                   | Yes (this work) |
| Gln <sup>CUG</sup> | Yes                   | Yes (this work) |
| Gln <sup>UUG</sup> | Yes                   | Not validated   |
| Glu <sup>CUC</sup> | No                    | Not validated   |
| Glu <sup>UUC</sup> | Yes                   | Yes (this work) |
| Gly <sup>CCC</sup> | Yes                   | Not validated   |
| Gly <sup>GCC</sup> | Yes                   | Yes (this work) |
| Gly <sup>UCC</sup> | Not known             | Not validated   |
| His <sup>GUG</sup> | Yes                   | Yes (this work) |
| Ile <sup>AAU</sup> | Yes                   | Not validated   |
| Ile <sup>UAU</sup> | Yes                   | Not validated   |
| Leu <sup>AAG</sup> | Yes                   | Yes (this work) |
| Leu <sup>CAA</sup> | Yes                   | Not validated   |
| Leu <sup>CAG</sup> | Yes                   | Not validated   |
| Leu <sup>UAA</sup> | Yes                   | Not validated   |

|                     |           |                             |
|---------------------|-----------|-----------------------------|
| Leu <sup>UAG</sup>  | Not known | Not validated               |
| Lys <sup>CUU</sup>  | Yes       | Not validated               |
| Lys <sup>UUU</sup>  | Yes       | Yes (this work)             |
| Met <sup>CAU</sup>  | Yes       | Not validated               |
| iMet <sup>CAU</sup> | Yes       | Most likely yes (this work) |
| Phe <sup>GAA</sup>  | Yes       | No (this work)              |
| Pro <sup>AGG</sup>  | Yes       | Not validated               |
| Pro <sup>CGG</sup>  | Yes       | Not validated               |
| Pro <sup>UGG</sup>  | Yes       | Not validated               |
| Ser <sup>UCA</sup>  | Yes       | Not validated               |
| Ser <sup>AGA</sup>  | Yes       | Not validated               |
| Ser <sup>CGA</sup>  | Yes       | Not validated               |
| Ser <sup>GCU</sup>  | Yes       | Not validated               |
| Ser <sup>UGA</sup>  | Yes       | Not validated               |
| Thr <sup>AGU</sup>  | Yes       | Not validated               |
| Thr <sup>CGU</sup>  | Not known | Not validated               |
| Thr <sup>UGU</sup>  | Not known | Not validated               |
| Trp <sup>CCA</sup>  | No        | Not validated               |
| Tyr <sup>GUA</sup>  | Yes       | Yes (this work)             |
| Val <sup>AAC</sup>  | Yes       | Yes (this work)             |
| Val <sup>CAC</sup>  | Yes       | Yes (this work)             |
| Val <sup>UAC</sup>  | Not known | No (this work)              |
