# Supplementary material
Source: PubMed Central journal article supplement (PMC5119773)
Supplement: NIHMS819499-supplement-8.pdf [file NIHMS819499-supplement-8.pdf]

**Table S2. Summary of the high-throughput sequencing reads, related to Data Resources in the STAR Methods section.**

| Experiment            | Sample / Replication | Mapped Reads |
|-----------------------|----------------------|--------------|
| CLIP (Control)        | replicate 1          | 31516978     |
|                       | replicate 2          | 44724926     |
| CLIP (ALKBH1)         | replicate 1          | 1913118      |
|                       | replicate 2          | 9609000      |
|                       | replicate 3          | 3335618      |
| tRNA seq of siControl | replicate 1          | 16342943     |
|                       | replicate 2          | 13489716     |
| tRNA seq of siALKBH1  | replicate 1          | 15050938     |
|                       | replicate 2          | 15190296     |
