# Supplementary material
Source: PubMed Central journal article supplement (PMC5119773)
Supplement: NIHMS819499-supplement-supplement_1.pdf [file NIHMS819499-supplement-supplement_1.pdf]

## KEY RESOURCES TABLE

| REAGENT or RESOURCE                                          | SOURCE                                        | IDENTIFIER     |
|--------------------------------------------------------------|-----------------------------------------------|----------------|
| Antibodies                                                   |                                               |                |
| Mouse monoclonal anti-m <sup>1</sup> A antibody              | Medical and Biological Laboratories Co., Ltd. | Cat# D345-3    |
| Rabbit polyclonal anti-TRMT61 antibody                       | Sigma                                         | Cat#SAB2700607 |
| Rabbit monoclonal anti-eEF1 $\alpha$ antibody                | Abcam                                         | Cat#ab157455   |
| Rabbit polyclonal anti-TRMT6 antibody                        | Sigma                                         | Cat#SAB2107213 |
| Chemicals, Peptides, and Recombinant Proteins                |                                               |                |
| DMEM                                                         | Gibco                                         | Cat#11965      |
| FBS                                                          | Gibco                                         | Cat#10438-026  |
| Pen/Strep                                                    | Gibco                                         | Cat#15140      |
| Dynabeads® Protein A for Immunoprecipitation                 | ThermoFisher                                  | Cat#10001D     |
| Anti-FLAG® M2 Magnetic Beads                                 | Sigma                                         | Cat#M8823      |
| Lactimidomycin                                               | EMD Millipore                                 | 5.06291.0001   |
| L-Homopropargylglycine                                       | ThermoFisher                                  | C10186         |
| SUPERNase In                                                 | ThermoFisher                                  | AM2694         |
| Critical Commercial Assays                                   |                                               |                |
| Dual-Luciferase® Reporter Assay System                       | Promega                                       | E1910          |
| NEB Next® Multiplex Small RNA Library Prep Set for Illumina® | NEB                                           | E7300S         |
| Deposited Data                                               |                                               |                |
| Raw data files for RNA sequencing                            | Gene Expression Omnibus (GEO)                 | GSE65299       |
| Experimental Models: Cell Lines                              |                                               |                |
| Mouse embryonic fibroblast wild type                         | Nordstrand et al., 2010                       | N/A            |
| <i>Alkbh1</i> <sup>-/-</sup> mouse embryonic fibroblast      | Nordstrand et al., 2010                       | N/A            |
| HeLa                                                         | ATCC (CCL-2)                                  | N/A            |
| <i>Alkbh1</i> <sup>-/-</sup> mouse embryonic stem cell       | Ougland et al., 2012                          | N/A            |
| Wild-type mouse embryonic stem cell                          | Ougland et al., 2012                          | N/A            |
| Recombinant DNA                                              |                                               |                |
| pMCSG19-His- <i>ALKBH1</i>                                   | This paper                                    | N/A            |

|                                                                                  |                                              |     |
|----------------------------------------------------------------------------------|----------------------------------------------|-----|
| pcDNA-ALKBH1 wild-type                                                           | This paper                                   | N/A |
| pcDNA-ALKBH1-H231AD233A mutant                                                   | This paper                                   | N/A |
| pMSCV-FLAG-HA-ALKBH1                                                             | This paper                                   | N/A |
| Sequence-Based Reagents                                                          |                                              |     |
| See method details for reporter mutant and RNAi oligoes                          | This paper                                   | N/A |
| See method details for biotinylated single-stranded DNA probes                   | This paper                                   | N/A |
| See method details for probes for biochemistry experiments                       | This paper                                   | N/A |
| See method details for Northern blot probes                                      | This paper                                   | N/A |
| Software and Algorithms                                                          |                                              |     |
| Trimmomatic                                                                      | Bolger et al., 2014                          | N/A |
| Other                                                                            |                                              |     |
| See summary of the high-throughput sequencing reads in SI Table S1               | This paper                                   | N/A |
| See Summary of tRNA m <sup>1</sup> A58 methylation in human tRNAs in SI Table S2 | Machnicka et al., 2013<br>Cozen et al., 2015 | N/A |
