# Supplementary material
Source: PubMed Central journal article supplement (PMC5119773)

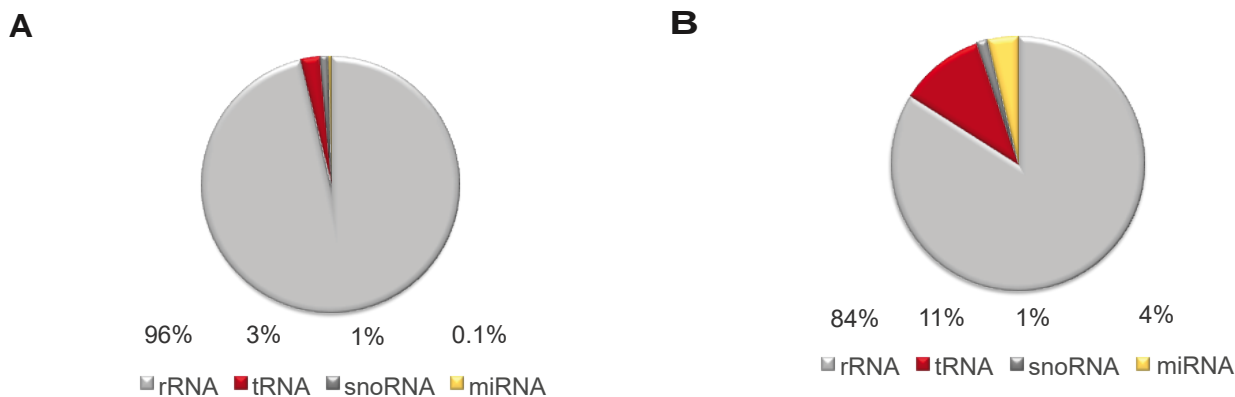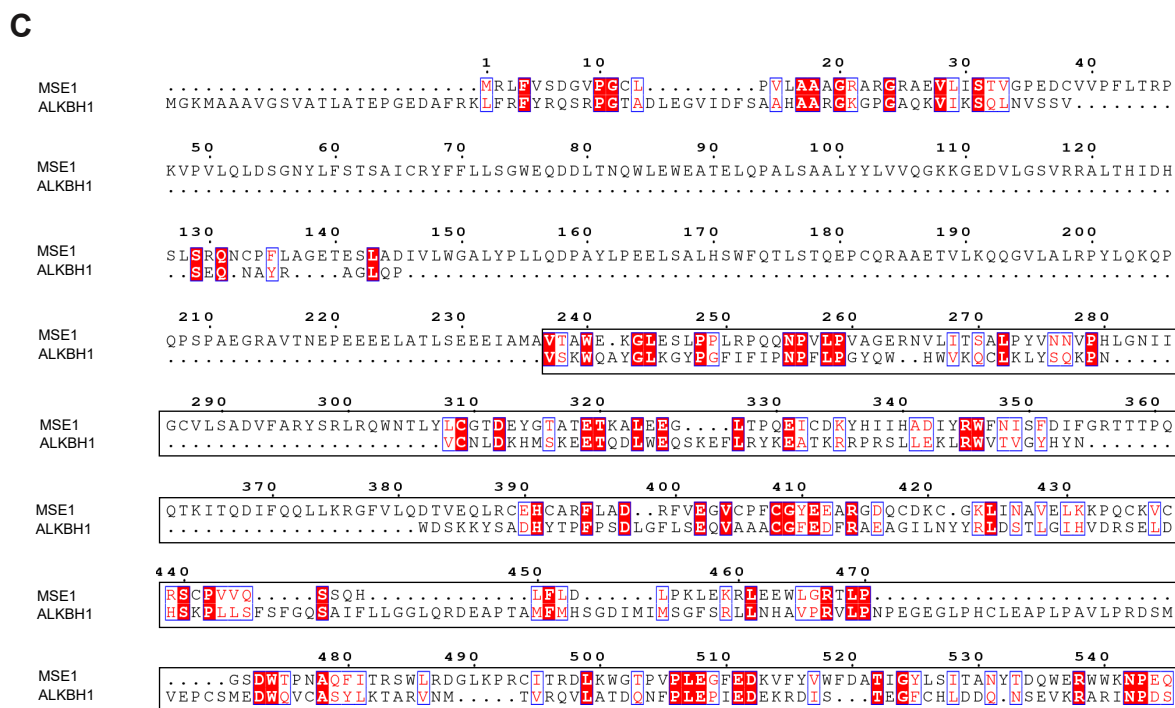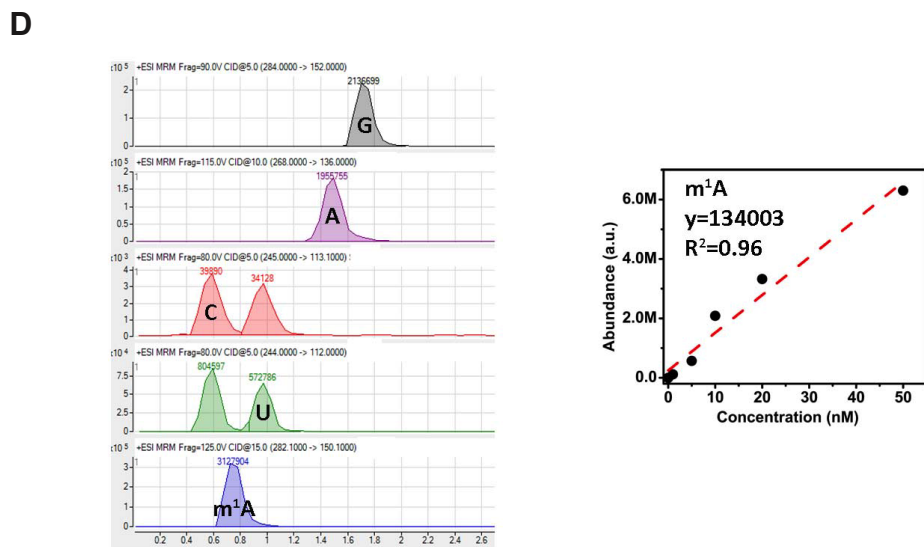

Supplement: NIHMS819499-supplement-1.pdf [file NIHMS819499-supplement-1.pdf]

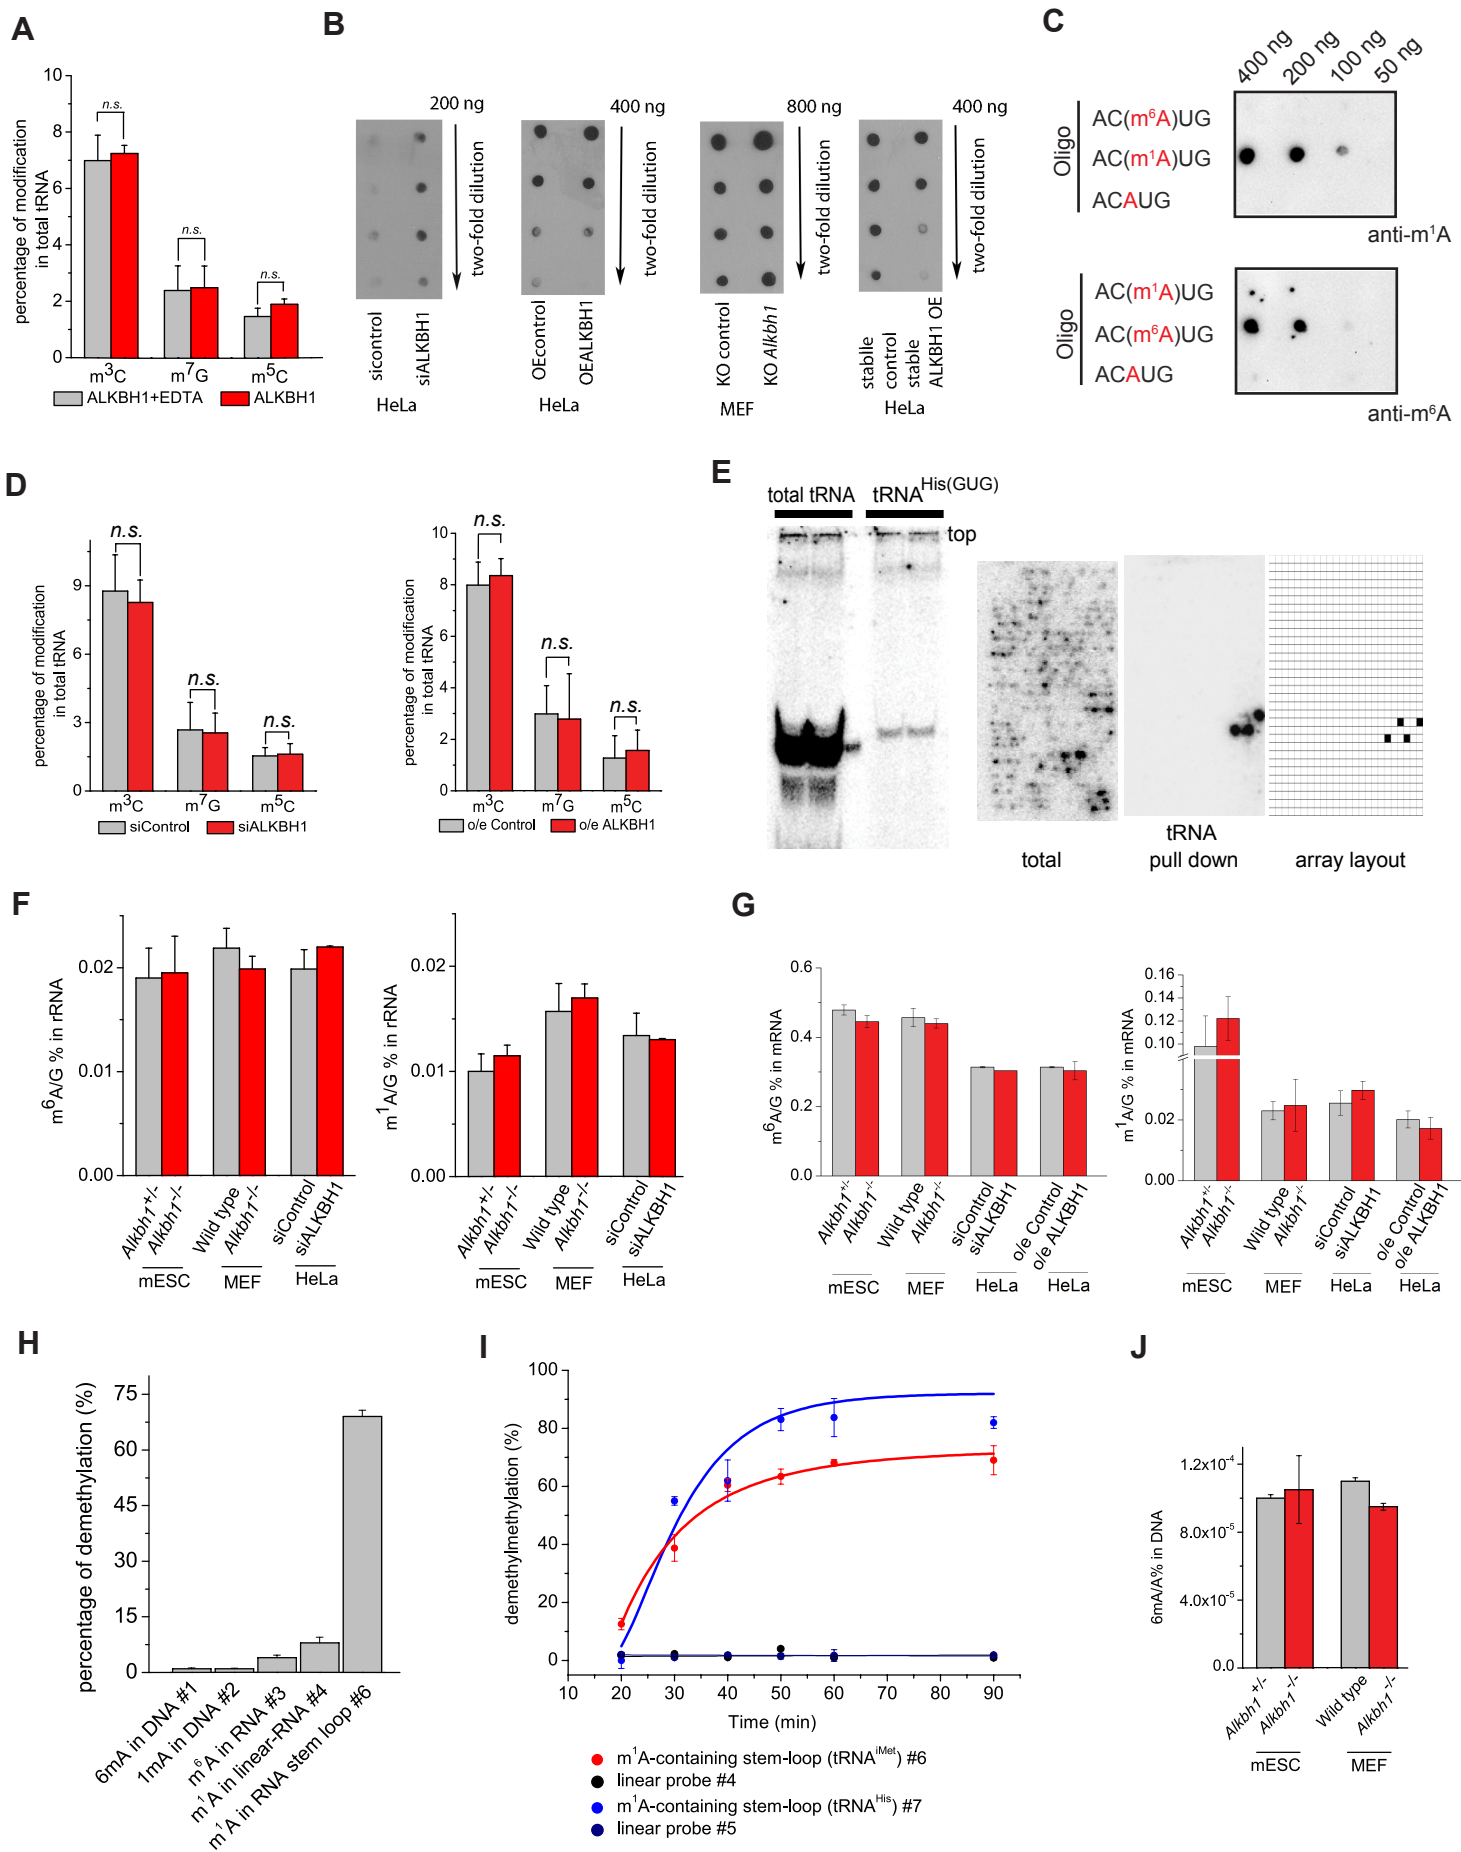

Supplement: NIHMS819499-supplement-2.pdf [file NIHMS819499-supplement-2.pdf]

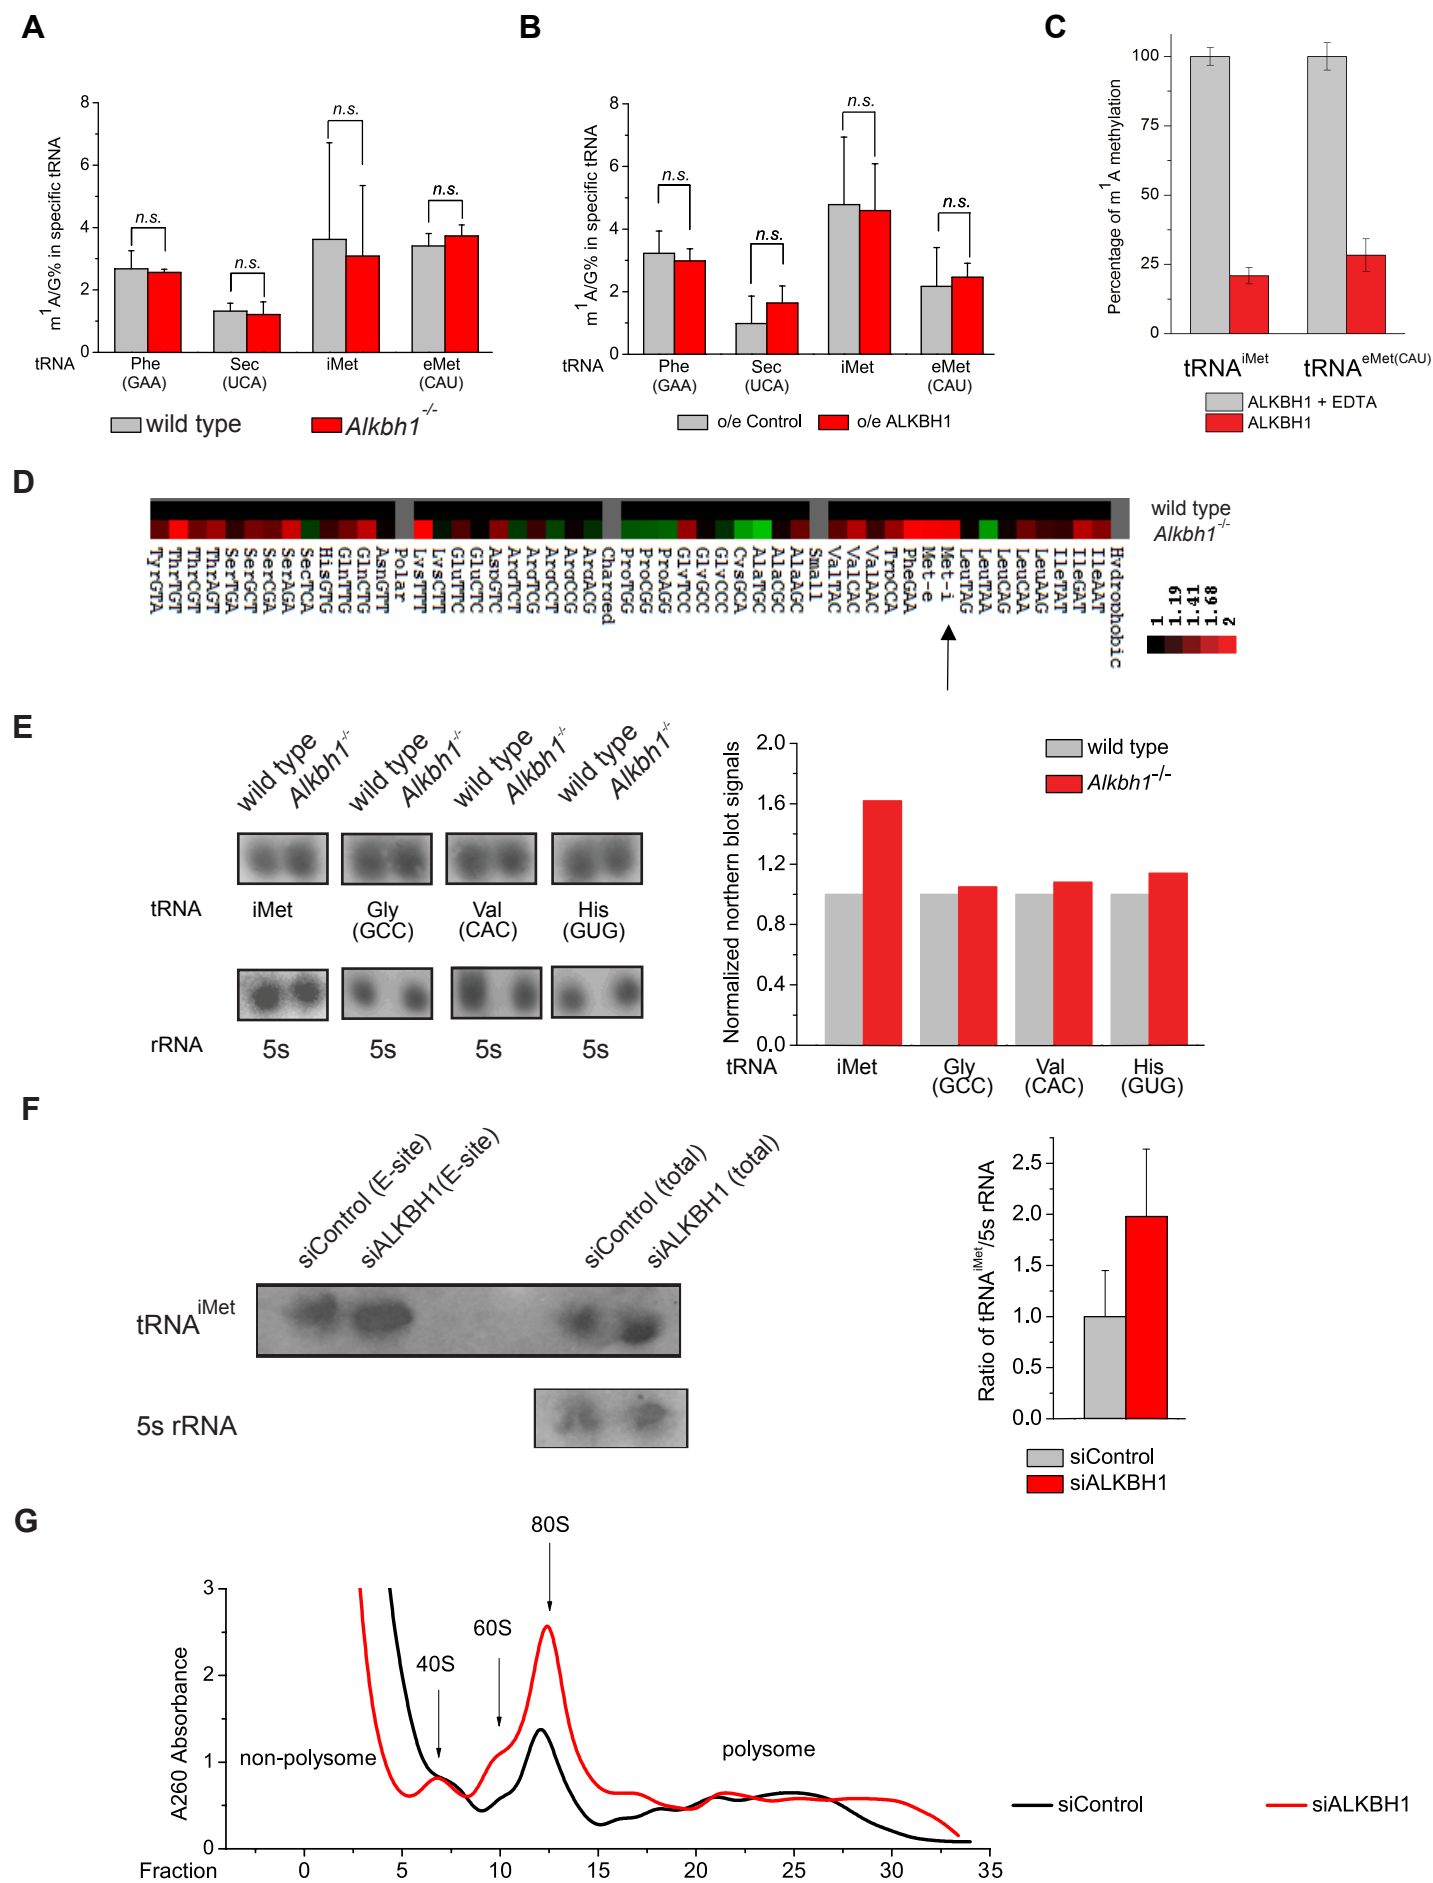

Supplement: NIHMS819499-supplement-3.pdf [file NIHMS819499-supplement-3.pdf]

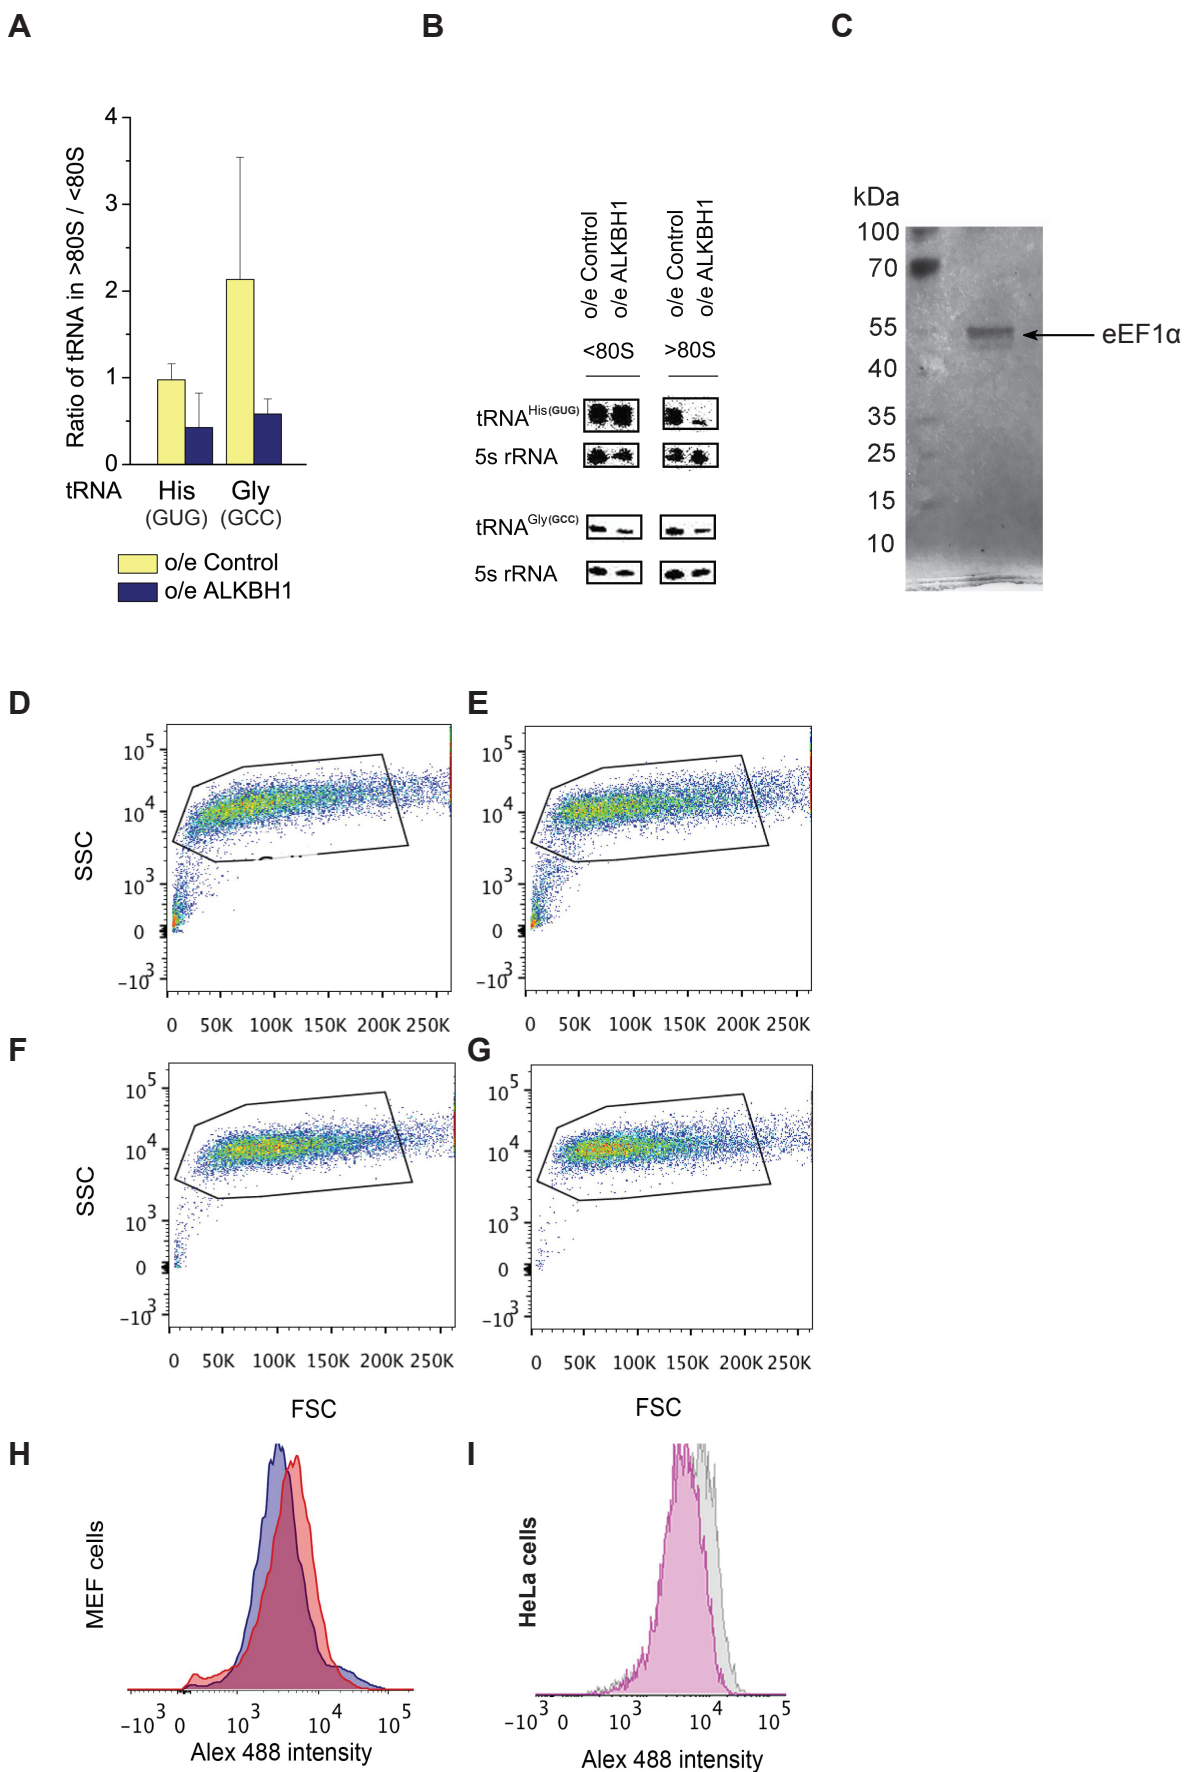

Supplement: NIHMS819499-supplement-4.pdf [file NIHMS819499-supplement-4.pdf]

**A**

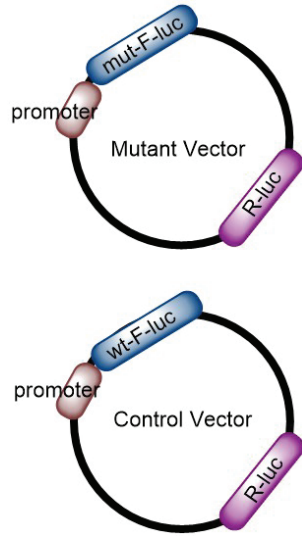

**B**

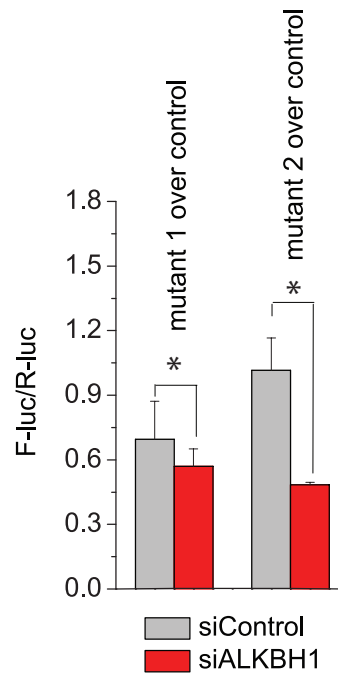

**C**

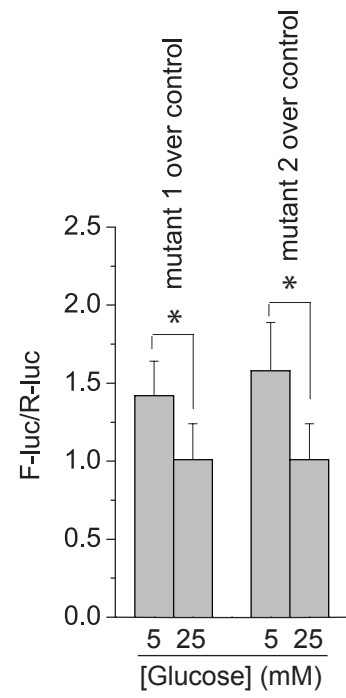

Supplement: NIHMS819499-supplement-5.pdf [file NIHMS819499-supplement-5.pdf]

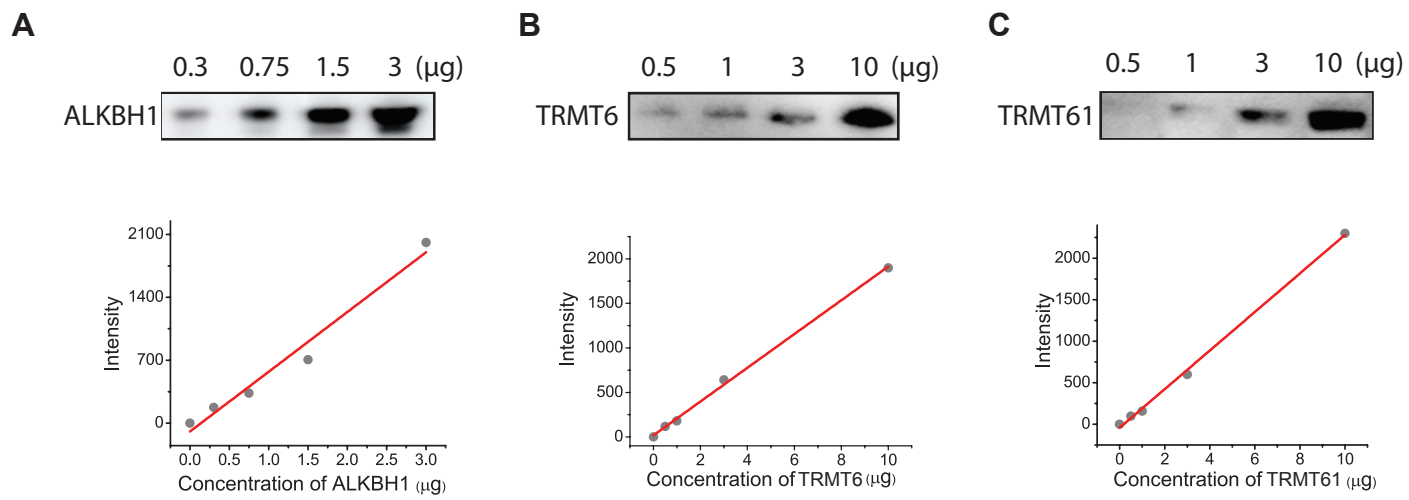

Supplement: NIHMS819499-supplement-6.pdf [file NIHMS819499-supplement-6.pdf]
